# Supplementary material for: Quantification and Classification of E. coli Proteome Utilization and Unused Protein Costs across Environments
Source: PLoS Comput Biol. 2016 Jun 28;12(6):e1004998. doi: 10.1371/journal.pcbi.1004998 (PMC4924638; doi:10.1371/journal.pcbi.1004998)
Supplement: S1 Table — (XLSX) [file pcbi.1004998.s006.xlsx]

## Sheet: core
b2690
b2519
b2518
b0003
b0002
b2697
b3983
b3829
b0416
b0417
b3987
b3986
b2515
b2514
b4171
b0004
b2926
b2927
b2215
b3734
b0521
b3736
b3737
b3730
b3731
b2609
b2608
b2607
b2606
b3738
b3739
b2601
b2600
b2517
b3919
b2585
b3359
b0893
b2103
b2567
b1095
b1093
b1092
b1098
b3780
b0414
b3185
b2779
b1378
b1277
b1278
b1377
b0415
b0908
b3172
b3176
b3179
b1876
b1871
b1870
b3318
b3319
b3708
b3255
b3312
b3313
b3310
b3311
b3316
b3317
b3314
b3315
b0688
b0680
b1779
b2312
b3384
b3735
b3389
b2318
b3671
b3670
b4180
b1480
b0179
b3770
b3771
b3772
b0173
b0172
b0171
b0170
b3406
b3732
b0423
b3957
b3958
b3959
b3733
b0429
b0194
b0058
b4006
b4005
b0529
b0051
b0052
b3816
b2935
b0907
b0452
b2559
b2557
b2224
b3493
b3924
b0221
b1606
b2284
b1114
b1835
b3850
b3198
b3199
b3196
b3197
b0642
b4384
b4262
b4261
b3940
b0639
b0884
b0635
b0636
b0014
b0015
b4041
b4049
b4166
b4160
b4162
b2183
b2185
b3741
b3740
b0126
b3345
b3744
b3747
b0088
b0087
b0086
b0085
b0084
b2342
b2341
b2838
b3429
b3846
b3844
b3845
b2987
b3960
b3965
b3967
b3849
b3343
b3994
b3997
b2500
b2501
b3992
b3993
b2465
b1084
b1086
b1089
b0406
b2765
b1269
b1264
b1260
b1261
b1262
b1263
b3065
b3067
b3461
b3146
b1866
b2566
b0841
b3465
b4122
b3247
b0477
b1740
b1748
b3390
b3396
b0168
b0169
b1344
b0166
b0436
b2282
b2946
b2280
b0432
b2286
b0430
b2827
b2288
b2530
b2532
b0029
b0185
b0182
b4019
b0181
b0023
b0025
b3805
b3321
b3320
b0928
b3936
b0339
b3939
b3988
b2436
b1637
b2942
b0807
b2379
b1822
b1704
b2747
b0090
b4371
b3433
b3117
b3299
b3298
b3297
b3296
b3295
b3294
b3290
b0722
b0723
b0721
b0724
b3057
b2874
b4053
b4054
b0474
b0475
b2019
b3982
b2599
b2276
b2277
b2278
b2279
b0979
b0978
b3200
b3201
b3202
b0154
b0159
b0091
b0092
b0096
b2153
b0026
b2407
b2400
b4024
b0074
b3870
b0072
b0073
b4022
b3972
b0078
b0524
b0077
b2478
b2573
b2575
b2574
b3470
b2472
b2474
b2283
b0071
b2281
b2708
b3430
b2287
b0526
b2499
b2285
b3985
b0431
b2114
b2794
b2791
b4238
b3984
b1210
b0750
b1215
b3084
b0754
b4407
b3018
b0859
b3809
b0109
b3231
b3230
b1693
b1692
b2614
b0386
b1652
b3804
b4013
b3559
b3651
b0381
b2687
b3344
b2914
b3341
b3340
b0405
b3342
b2290
b2836
b4142
b4143
b0031
b0388
b4090
b0929
b3339
b2741
b2746
b2745
b0323
b2594
b0241
b0243
b0242
b3256
b0661
b0930
b3704
b3706
b3703
b1133
b1135
b4200
b4203
b4202
b1714
b1716
b1717
b1718
b4208
b1363
b3560
b3288
b3289
b3165
b3164
b3167
b3166
b3169
b3168
b3282
b0948
b3287
b3990
b1622
b3637
b3040
b3041
b3309
b3308
b3301
b3303
b3302
b3305
b3304
b3307
b3306
b3991
b0967
b0969
b2316
b0149
b3608
b3941
b2806
b2140
b0369
b2551
b3783
b0048
b2960
b0915
b0914
b0444
b0911
b0910
b2564
b1719
b0918
b1069
b1713
b0175
b3774
b2890
b2891
b2026
b2025
b2024
b2023
b2022
b2021
b2020
b2785
b1208
b1611
b1207
b1612
b1190
b0420
b1291
b1297
b3008
b1211
b1109
b1662
b2818
b3181
b3186
b0273
b3189
b3636
b3633
b4258
b4254
b4237
b2329
b2320
b2323
b2324
b3648
b3649
b3281
b3643

## Sheet: C
b2923
b2925
b3916
b1270
b1276
b4358
b4356
b0709
b0870
b4130
b4139
b4138
b1479
b1478
b1473
b1475
b1474
b1476
b0677
b0678
b0679
b0904
b0903
b4245
b3583
b3581
b3580
b3588
b3915
b3917
b3091
b3541
b3368
b3693
b3691
b3749
b3748
b2344
b2167
b2168
b2169
b3962
b3966
b2508
b1640
b0842
b4120
b4123
b0118
b0115
b0114
b0116
b0112
b4014
b4015
b0933
b0932
b0937
b0936
b0935
b0934
b0334
b0331
b0333
b3028
b3590
b3591
b3599
b4032
b3114
b3115
b3116
b3374
b3370
b3371
b3752
b2150
b2154
b2406
b2979
b2975
b2976
b2579
b2539
b2538
b2883
b2882
b2799
b2797
b2796
b1216
b1189
b0854
b0855
b0856
b0857
b1852
b1851
b1850
b1854
b1676
b1325
b1326
b1453
b0104
b1329
b4244
b4240
b0612
b4069
b1521
b1525
b4067
b4467
b4460
b4468
b2542
b3568
b3565
b3564
b3567
b3566
b3161
b2366
b3415
b3946
b3417
b3416
b2148
b2149
b2416
b2417
b2415
b2964
b2965
b2092
b2093
b2091
b2096
b2097
b2094
b2095
b1062
b2788
b2789
b2787
b4322
b4323
b4321
b1492
b1200
b1198
b1199
b1192
b0352
b0822
b0825
b0827
b0826
b0828
b1849
b1440
b1441
b1442
b1443
b1444
b0007
b0009
b0008
b1539
b4077
b0480
b4476
b4477
b4474
b4471
b4478
b3578
b3579
b3577
b3572
b2310
b3951
b2429
b2428
b3403
b3956
b2422
b2133
b2425
b2424
b2957
b2221
b2223
b2222
b2045
b1250
b4311
b1302
b3945
b4268
b4260
b4267
b4266
b4265
b0630
b1238
b2143
b0123
b0945
b0308
b0306
b0307
b0720
b0726
b0727
b0729
b3543
b3542
b3093
b3540
b3544
b4055
b2306
b2307
b2308
b3437
b2943
b3893
b3892
b3894
b2239
b2540
b2541
b3750
b0809
b1319
b0158
b3089
b3553
b2930
b2937
b3426
b4084
b2066
b2065
b2841
b2441
b2440
b1817
b1814
b0810
b0811
b1819
b1818
b1033
b0781
b0783
b0785
b1764
b1767
b4193
b4192
b4195
b4194
b4197
b4196
b4198
b1711
b0366
b0367
b0365
b2868
b3526
b3528
b3451
b3450
b3453
b3452
b3455
b3454
b3457
b3456
b2210
b3857
b3856
b2587
b2458
b1800
b1801
b1805
b4213
b0511
b0512
b0514
b0517
b0516
b1773
b1484
b1485
b1486
b1487
b1483
b0356
b0355
b0353
b0351
b0350
b0957
b4227
b2663
b2662
b2867
b2866
b2464
b2463
b2523
b1015
b1014
b0767
b0764
b0765
b0763
b1901
b1900
b0508
b0509
b4087
b0507
b4085
b0505
b1747
b1746
b1745
b1744
b0692
b0693
b0343
b0433
b0347
b0348
b0349
b0188
b4129
b4086
b0238
b0237
b3612
b3617
b3616
b2678
b2679
b2903
b2904
b2905
b2871
b3875
b2704
b2705
b2702
b2703
b2492
b0344
b1002
b1006
b4239
b0759
b0758
b4230
b0757
b0756
b0755
b1919
b4088
b0403
b4094
b3447
b2393
b2243
b2242
b2241
b2240
b3605
b3600
b3603
b2801
b2800
b2803
b2802
b1245
b3460
b2738
b2029
b1613
b1927
b1922
b1296
b1101
b2423
b1107
b4395
b1723
b0411
b0522
b0523
b3073
b2388
b3709
b2251
b3496
b3925
b3927
b3926
b1605
b1602
b1603
b1281
b1119
b4381
b4382
b1732
b1734
b0733
b0732
b0734
b0394
b4035
b0061
b0063
b0062
b3500
b3061
b3062
b3063
b2677
b3714
b3666
b3665
b2536
b3803
b1638
b1634
b3751
b1126
b1125
b1124
b1123
b1702
b1701
b1252
b0654
b0655
b0652
b0653
b1709
b4374
b1389
b1388
b0728
b1380
b1387
b1386
b1385
b4119
b4388
b1415
b4111
b4115
b4289
b4288
b4287
b0731
b1232
b2913
b3729
b3236
b3092
b3128
b3125
b3124
b3127
b3654
b3653
b3831
b2526
b2527
b2296
b2297
b2476
b2744
b3903
b3902
b3907
b3904
b3909
b1136
b1246
b1247
b1244
b1243
b1241
b1394
b1395
b1397
b1390
b1391
b1392
b1393
b1398
b1621
b1623
b0864
b0861
b0860
b0863
b0862
b4293
b4290
b4291
b4036
b4034
b4033
b4031
b4485
b4117
b3006
b3005
b4231
b4232
b4233
b3222
b3223
b3224
b3225
b3126
b3640
b3137
b3642
b3132

## Sheet: N
b2923
b2925
b3916
b1270
b1276
b0709
b0875
b0870
b4130
b1479
b1473
b0677
b0678
b0679
b0903
b4245
b3588
b3915
b3917
b3541
b3366
b3365
b3368
b3966
b2507
b2508
b1640
b0842
b0118
b0115
b0114
b0116
b0112
b1468
b1469
b1466
b1467
b1465
b4014
b0932
b0337
b0336
b3590
b3591
b3114
b3115
b3116
b2150
b2406
b2976
b2579
b2883
b2882
b2797
b2796
b1216
b1189
b1186
b0854
b0855
b0856
b0857
b1851
b1850
b1854
b1676
b1325
b1326
b1453
b0104
b1329
b4244
b1525
b4067
b3161
b2366
b3946
b2148
b2149
b2417
b2415
b2964
b2965
b2097
b1062
b2789
b1492
b1200
b1198
b1199
b1192
b0825
b0827
b0828
b1849
b1440
b1441
b1442
b1443
b1444
b0007
b0009
b0008
b1539
b4072
b4073
b4070
b4071
b4077
b0480
b4471
b0451
b3572
b2310
b3951
b2429
b2428
b3403
b3956
b2422
b2133
b2425
b2424
b2957
b2552
b2223
b4311
b1302
b4260
b0630
b1238
b2143
b0123
b0945
b0720
b0726
b0727
b0729
b3543
b3542
b3540
b3544
b4055
b2306
b2307
b2308
b2943
b2239
b4301
b0809
b1319
b1223
b1224
b1225
b1226
b1227
b0158
b3089
b3426
b2066
b2065
b2441
b2440
b1817
b1814
b0810
b0811
b1819
b1818
b0781
b0783
b0785
b1764
b1767
b1761
b1711
b2868
b3528
b3451
b3450
b3453
b3452
b3455
b3454
b3457
b3456
b2210
b3857
b3856
b2458
b1801
b4213
b0511
b0512
b0517
b0516
b1773
b1484
b1485
b1486
b1487
b1483
b0957
b2663
b2662
b2867
b2866
b2464
b2463
b2523
b1015
b1014
b1012
b1011
b1010
b0764
b0765
b0763
b0509
b0507
b1747
b1746
b1745
b1744
b0692
b0693
b0341
b0433
b4129
b0238
b0237
b3617
b3616
b2678
b2679
b2903
b2904
b2905
b2871
b3875
b0340
b2497
b1008
b1009
b1002
b1006
b1007
b1919
b4094
b3447
b2393
b2243
b2242
b2241
b2240
b1245
b3460
b1922
b1296
b1101
b2423
b1107
b1723
b0411
b4177
b0522
b0523
b3073
b2388
b3709
b3380
b3386
b2251
b3496
b1605
b1602
b1603
b1281
b1119
b4381
b4382
b4383
b1732
b1734
b0733
b0734
b2677
b3714
b3666
b3665
b3803
b1638
b1634
b1126
b1125
b1124
b1123
b1252
b0657
b0654
b0655
b0652
b0653
b1709
b4374
b1389
b1388
b0728
b1380
b1387
b1386
b1385
b4388
b4111
b4115
b4025
b1232
b2913
b3729
b3236
b3125
b3124
b3127
b3654
b3653
b3831
b2526
b2527
b2296
b2297
b2835
b2476
b2744
b1131
b1136
b1246
b1247
b1244
b1243
b1394
b1395
b1397
b1390
b1391
b1392
b1393
b1398
b1621
b1623
b0864
b0861
b0860
b0863
b0862
b4117
b3006
b3005
b4233
b3222
b3223
b3224
b3225
b3640
b3642

## Sheet: P
b2925
b2997
b2996
b2995
b2994
b3916
b1270
b1473
b0677
b0678
b0679
b0903
b4245
b3917
b3966
b2507
b2508
b0842
b0115
b0114
b0116
b0112
b3590
b3591
b3114
b3115
b3116
b2150
b2406
b2579
b2883
b2797
b2796
b1216
b1851
b1850
b1854
b1676
b0104
b4244
b4067
b3946
b2148
b2149
b2416
b2417
b2415
b2964
b2097
b1062
b2780
b1200
b1198
b1199
b0825
b0827
b1849
b0009
b0008
b0480
b4471
b0451
b3951
b2422
b2133
b2425
b2424
b3945
b0630
b1238
b2143
b0123
b0945
b0726
b0727
b0729
b4055
b2943
b2239
b1319
b0576
b0974
b0973
b0972
b0158
b3089
b3426
b2066
b2065
b2441
b2440
b1817
b1814
b1819
b1818
b0781
b0783
b0785
b1764
b1711
b2868
b3451
b3450
b3453
b3452
b3455
b3454
b3457
b3456
b2210
b3857
b3856
b2458
b4213
b0511
b0512
b0517
b0516
b1773
b0957
b2867
b2866
b2464
b2719
b0764
b0765
b0763
b1907
b0980
b4129
b0238
b3617
b3616
b2903
b2904
b2905
b3875
b1002
b1006
b4094
b2393
b2243
b2242
b2241
b2240
b3460
b1613
b1101
b2423
b1723
b0411
b4177
b0522
b0523
b2388
b3380
b2251
b2724
b2720
b2721
b2722
b2723
b3927
b3926
b1281
b4381
b4382
b4383
b3666
b3665
b3803
b1252
b1709
b4374
b0728
b1380
b4388
b4025
b0383
b1232
b2913
b3729
b3236
b3831
b2526
b2527
b2296
b2297
b2476
b2744
b1131
b1621
b1623
b3006
b3005
b3640
b3642

## Sheet: S
b1276
b1479
b3917
b3541
b3368
b3966
b2762
b2763
b2764
b0842
b0118
b4014
b0933
b0932
b0936
b0935
b0934
b3590
b3591
b2154
b2979
b2976
b1216
b4067
b4467
b4468
b2414
b2097
b2789
b1492
b1206
b0827
b0009
b0008
b4077
b0451
b3956
b2422
b2425
b2424
b2221
b2222
b4260
b0123
b0720
b0729
b3543
b3542
b3540
b3544
b0158
b0781
b0783
b0785
b1764
b1761
b0368
b1711
b0366
b0367
b0365
b3857
b3856
b4214
b1773
b0356
b0355
b2663
b2464
b2463
b2523
b0764
b0765
b0763
b0509
b0507
b4129
b0237
b1919
b3447
b3607
b1922
b2423
b2421
b1723
b0888
b3500
b3803
b2751
b2750
b2752
b1252
b0654
b0655
b0652
b0653
b1709
b0728
b4388
b1415
b2913
b3125
b3127
b3653
b1136
b3006
b3005

## Sheet: non-ME
b0605	oxidative stress
b0606	oxidative stress
b4401	regulation
b3237	regulation
b1412	oxidative stress
b0435	regulation
b0882	proteostasis
b2592	proteostasis
b0437	proteostasis
b0438	proteostasis
b3912	regulation
b3357	regulation
b3556	regulation
b1275	regulation
b0161	proteostasis
b3234	proteostasis
b0145	regulation
b3701	replication
b3860	proteostasis
b2209	proteostasis
b3261	regulation
b4207	proteostasis
b3347	proteostasis
b0028	proteostasis
b1923	flagellar
b1334	regulation
b0094	cell division
b3463	cell division
b3464	cell division
b0095	cell division
b0683	regulation
b2042	antigen biosynthesis
b2553	regulation
b0838	M
b3699	replication
b1967	M
b3510	acid resistance
b3509	acid resistance
b1619	M
b4174	regulation
b1103	M
b0178	proteostasis
b1237	regulation
b3401	proteostasis
b3931	proteostasis
b0473	proteostasis
b4000	regulation
b0440	regulation
b3686	proteostasis
b1712	regulation
b0912	regulation
b0382	regulation
b2531	regulation
b2524	regulation
b0220	host interaction
b2569	E
b0891	E
b0439	proteostasis
b3147	M
b0889	regulation
b1516	M
b1517	M
b4037	unknown
b0806	antigen biosynthesis
b1048	osmotic stress
b3938	regulation
b1175	cell division
b1174	cell division
b3742	replication
b0782	unknown
b2684	regulation
b3251	cell division
b2113	M
b1051	unknown
b1976	regulation
b0675	M
b3998	DNA repair
b0851	M
b3414	E
b3661	unknown
b3405	regulation
b1482	osmotic stress
b1739	osmotic stress
b4376	osmotic stress
b0113	regulation
b2908	proteostasis
b3847	proteostasis
b1127	proteostasis
b1130	regulation
b3863	DNA repair
b3363	proteostasis
b0525	proteostasis
b3775	proteostasis
b1830	proteostasis
b3498	proteostasis
b1304	regulation
b3204	regulation
b1658	regulation
b2597	regulation
b2217	regulation
b0393	DNA repair
b2699	DNA repair
b0610	regulation
b3929	regulation
b4255	regulation
b2009	regulation
b0098	protein translocation
b3609	protein translocation
b0687	regulation
b3349	proteostasis
b1743	proteostasis
b4059	replication
b2669	regulation
b0053	proteostasis
b4252	regulation
b2834	unknown
b3244	proteostasis
b1324	oxidative stress
b3871	regulation
b2426	unknown
b2319	unknown
b3495	general stress
b1333	general stress
b1376	general stress
b0607	general stress
b0422	DNA repair
b1749	DNA repair
b0006	oxidative stress
b0163	unknown
b0324	unknown
b0325	M
b0329	unknown
b0391	unknown
b0434	unknown
b0424	oxidative stress
b0419	unknown
b0426	unknown
b0471	unknown
b0453	unknown
b0492	proteostasis
b0599	unknown
b0631	unknown
b0643	unknown
b0660	unknown
b0686	M
b0753	unknown
b0773	unknown
b0800	unknown
b0801	unknown
b0819	M
b0820	unknown
b0897	unknown
b0927	unknown
b1003	unknown
b0965	unknown
b1035	unknown
b1088	unknown
b1087	unknown
b1056	unknown
b1128	regulation
b1108	unknown
b1180	unknown
b1219	unknown
b1257	unknown
b1251	unknown
b1267	unknown
b1406	unknown
b1414	unknown
b1431	unknown
b1498	unknown
b1541	unknown
b1614	unknown
b1604	unknown
b1667	unknown
b1765	unknown
b1780	unknown
b1783	regulation
b1864	unknown
b1847	unknown
b1832	M
b1836	unknown
b1839	unknown
b1930	unknown
b2012	unknown
b1983	unknown
b2007	unknown
b2016	unknown
b2080	unknown
b2171	unknown
b2293	M
b2294	unknown
b2343	unknown
b2431	M
b2494	proteostasis
b2495	unknown
b2581	unknown
b2665	unknown
b2909	unknown
b2898	unknown
b2959	unknown
b2962	oxidative stress
b2989	unknown
b3038	unknown
b3024	unknown
b3448	unknown
b4554	unknown
b3764	unknown
b4045	unknown
b4391	regulation
b1452	unknown
